# Supplementary figures and images for: D3 lymph node dissection with versus without left colic artery preservation in single-incision laparoscopic surgery for sigmoid and rectosigmoid cancer: a propensity score-matched analysis
Source: Research Square preprint supplement (doi:10.21203/rs.3.rs-1984519/v1), 2022-08-31

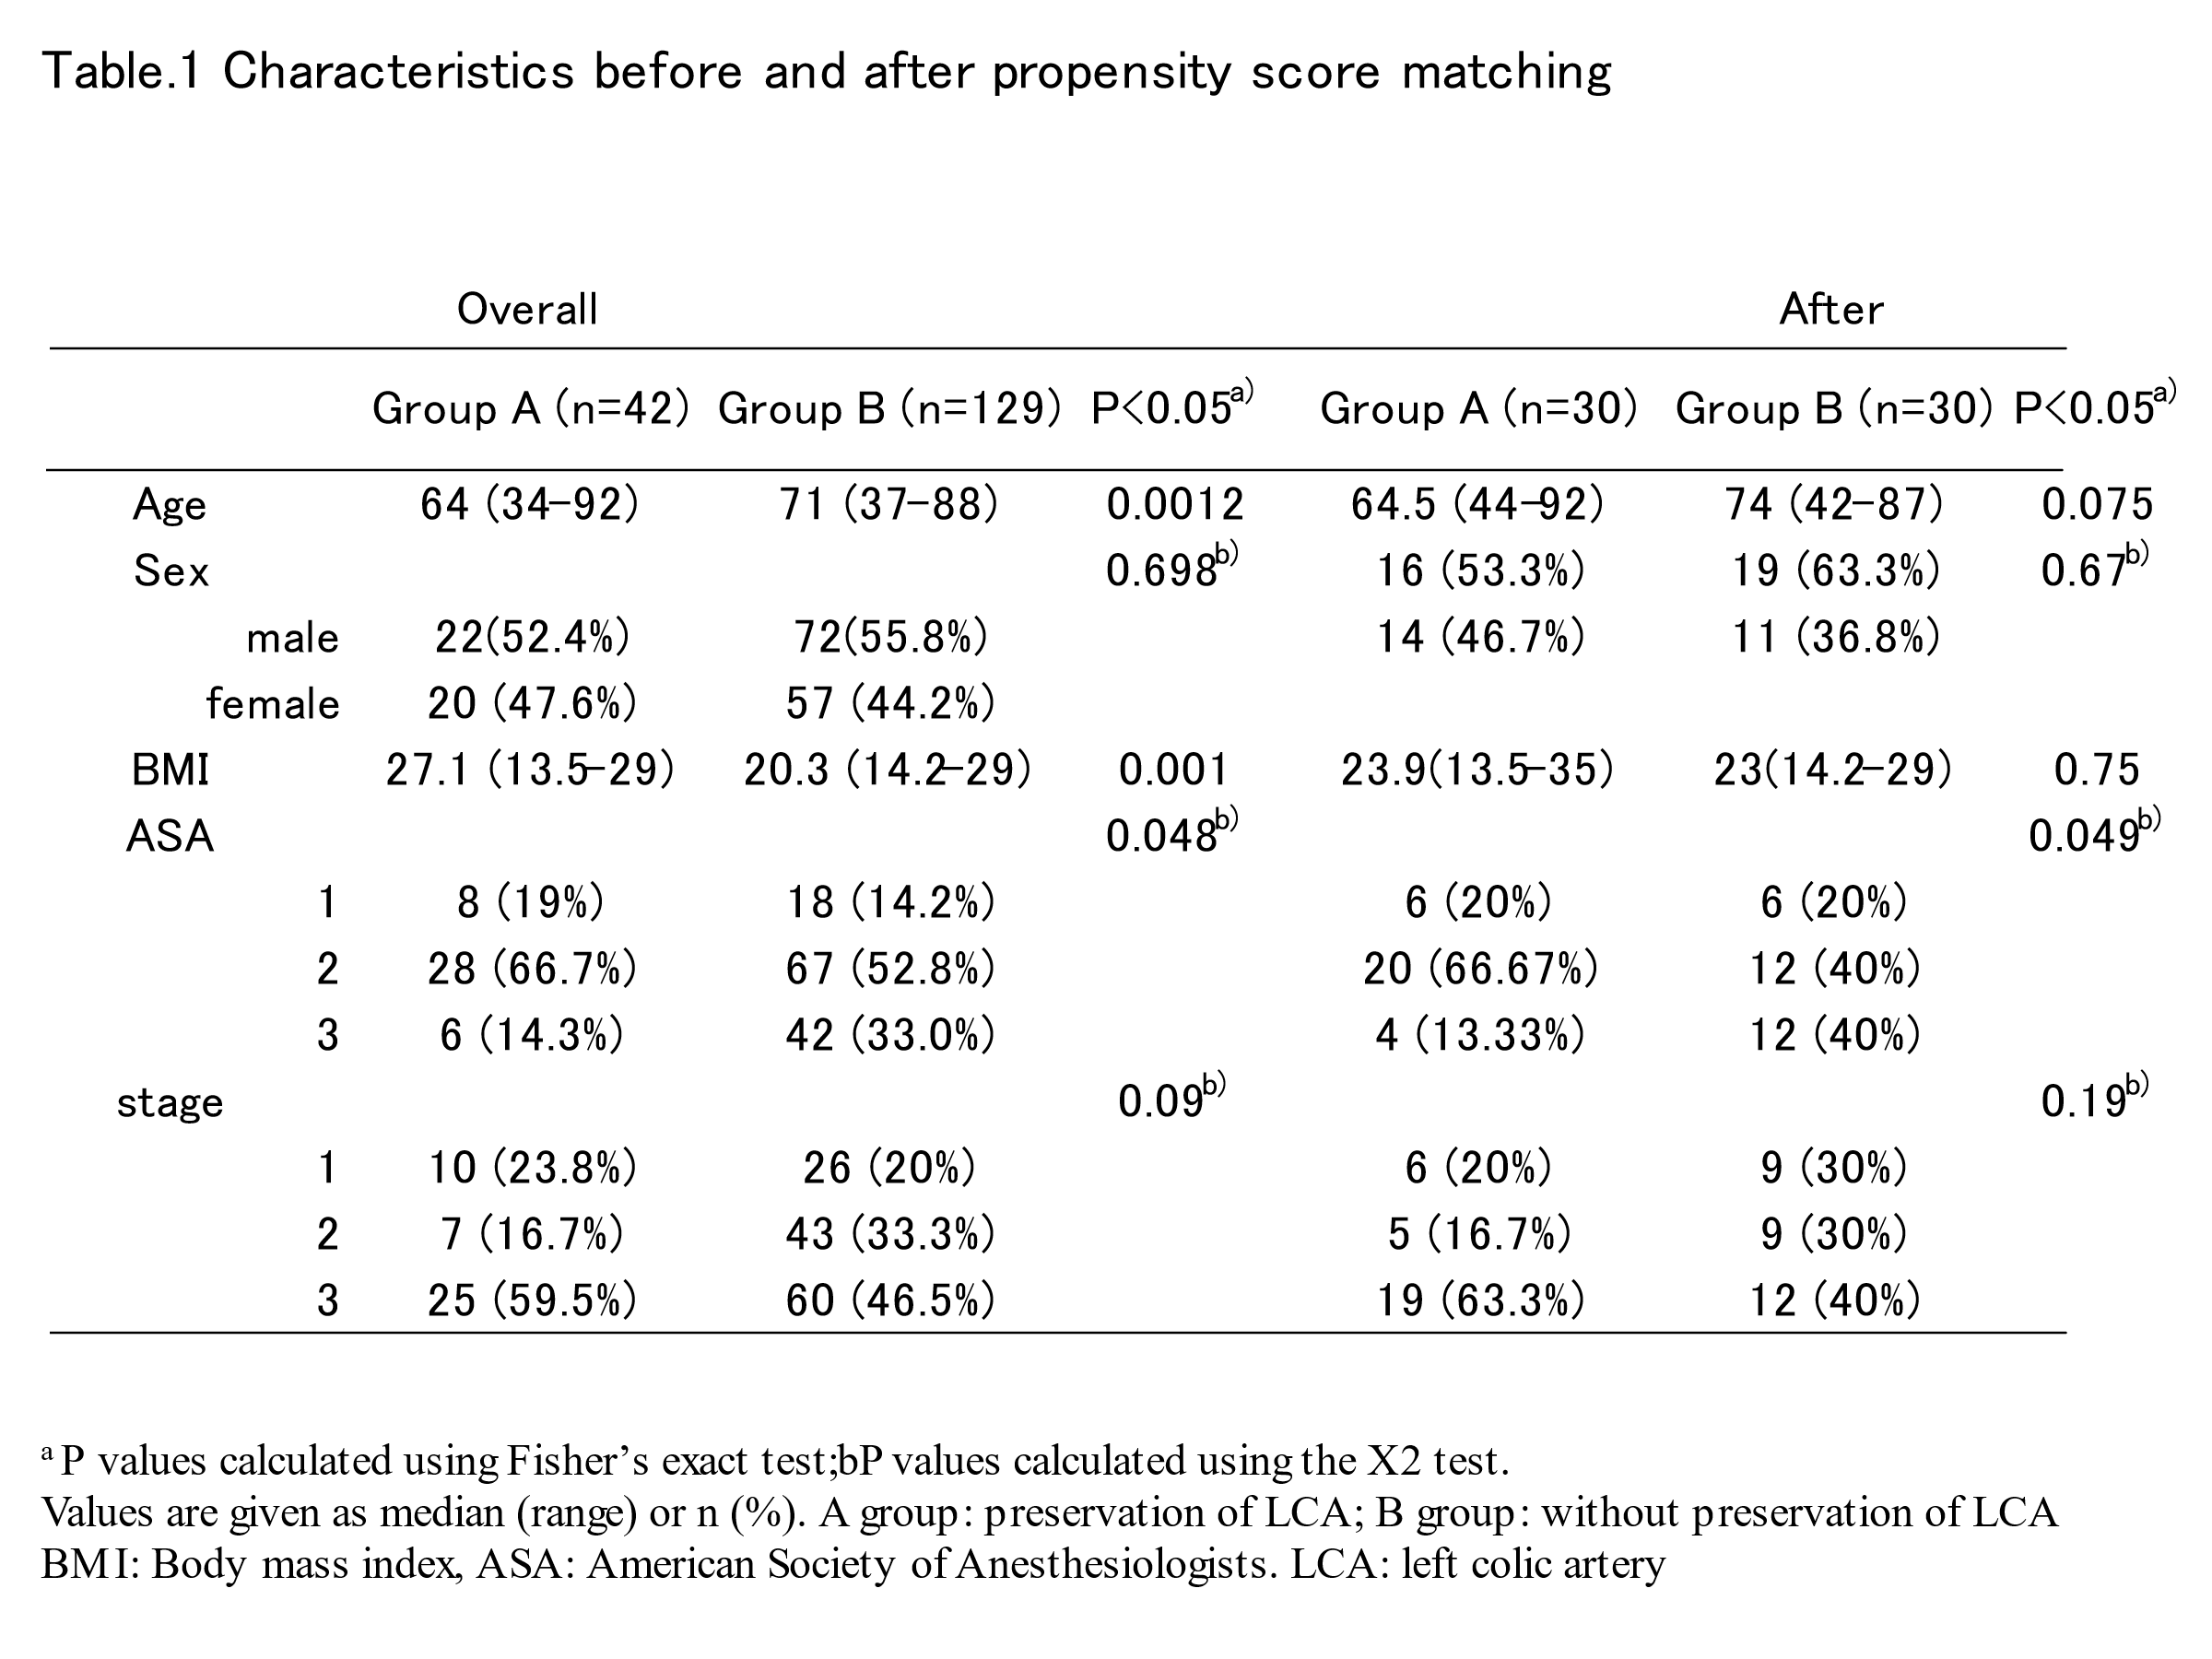

Supplement: Supplementary file 1 [file c441b2e92550b3b944d677f9.docx]

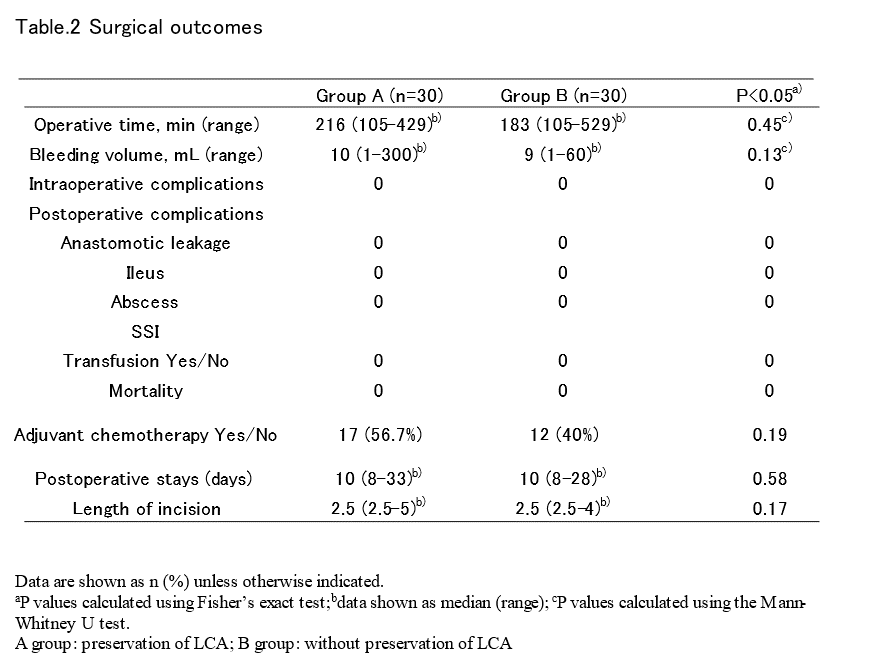

Supplement: Supplementary file 2 [file cb7ed34ca31bca63648da6f0.docx]

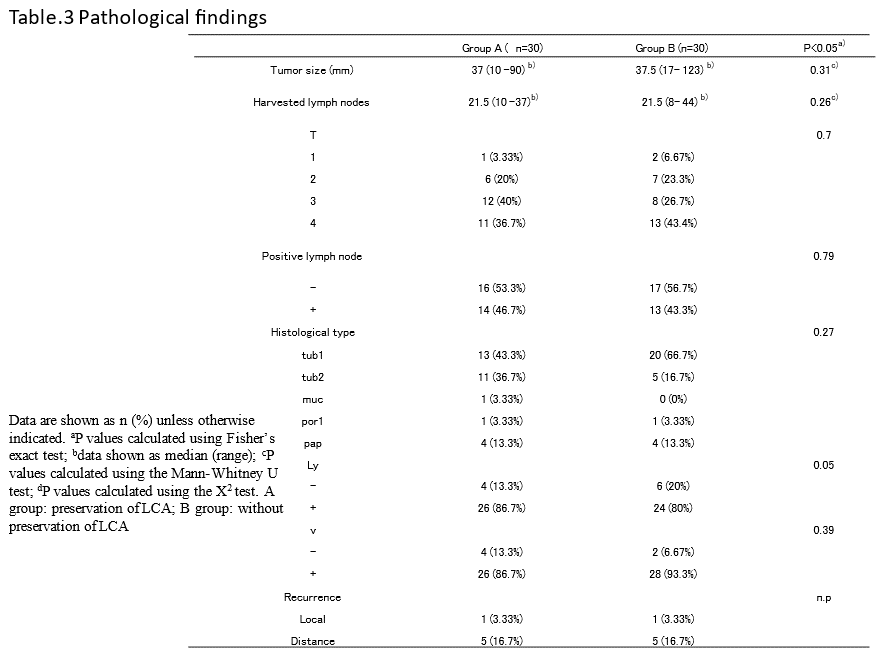

Supplement: Supplementary file 3 [file d1b714aab86674f85d8b8bce.docx]
